# Supplementary material for: The C-Terminal Extension Unique to the Long Isoform of the Shelterin Component TIN2 Enhances Its Interaction with TRF2 in a Phosphorylation- and Dyskeratosis Congenita Cluster-Dependent Fashion
Source: PubMed Central journal article supplement (PMC5974431; doi:10.1128/mcb.00025-18), 2018-05-29
Supplement: MCB.00025-18_zmb999101768s1.pdf [file MCB.00025-18_zmb999101768s1.pdf]

|            |                  |     |                                                              |     |
|------------|------------------|-----|--------------------------------------------------------------|-----|
| Q9BSI4     | TINF2_HUMAN      | 370 | PPRARK---PVCPPSLCSSLVITIGDLVLDSD--EENGQGEK-----              | 407 |
| G2HJU8     | G2HJU8_PANTR     | 372 | PPRARK---PVCPPSLCSSLVITIGDLVLDSD--EENGQGEK-----              | 409 |
| G1RZI8     | G1RZI8_NOMLE     | 370 | PPRARK---PVCPPSLCSSLVITIGDLVLDSD--EENGQGEK-----              | 407 |
| F7GSQ3     | F7GSQ3_CALJA     | 370 | PPRARK---PVCTPSLCSNVITIGDLVLDSD--EENGQGEK-----               | 407 |
| A0A0D9RTU0 | A0A0D9RTU0_CHLSB | 370 | PPRAKK---PVCPPSLCSSLVITIGDLVLDSD--EENGQGEK-----              | 407 |
| A0A096NXA6 | A0A096NXA6_PAPAN | 369 | PPRARK---PVCPPSLCSSLVITIGDLVLDSD--EENGQGEK-----              | 406 |
| F6ZRV3     | F6ZRV3_HORSE     | 372 | PPRARK---PVGPPSMCSSLVITIGDLVLDSD--EENGQREGR-----             | 409 |
| M3W4C5     | M3W4C5_FELCA     | 372 | PPKARK---PVCPPSLCSSLVITIGDLVLDSD--EENDQREGR-----             | 409 |
| I3M084     | I3M084 ICTTR     | 368 | PPRAKN---PVCSPSLCSSLVITIGDLVLDSD--EENSQREGK-----             | 405 |
| F1SGN9     | F1SGN9_PIG       | 371 | PPRARK---PACPPSLCSSLVITIGDLVLDSEEEEEENGPREGK-----            | 410 |
| M3Y318     | M3Y318_MUSPF     | 371 | PPRTRK---PLCPPSLCSSLVITIGDLVLDSD--EENGQKEGR-----             | 408 |
| L8I0G5     | L8I0G5_9CETA     | 372 | PPRKS----VCPPSLYSSDITIGDLVLDSD--EEDGQRERR-----               | 407 |
| A3KN17     | A3KN17_BOVIN     | 372 | PPRKS----VCPPSLYSSDITIGDLVLDSD--EEDGQRERR-----               | 407 |
| A0A1U7U6L7 | A0A1U7U6L7_TARSY | 376 | PPRARK---PVCPPSLCSSLVITIGDLVLDSD--EENGQREGKVSQRKEQKARKGQGQNK | 430 |
| F1Q2J9     | F1Q2J9_CANLF     | 385 | PPRARK---PVCPPSLCSSLVITIGDLVLDSD--EENVQKEGR-----             | 422 |
| W5QCX6     | W5QCX6_SHEEP     | 372 | PPRKSALFPTVCPSSLYSSDITIGDLVLDSD--EEDGQREGR-----              | 412 |
| K9J163     | K9J163_DESRO     | 371 | SPRARK---PVCPPSLCSSLVITIGDLVLDSD--EENGQREGM-----             | 408 |
| G1MCN1     | G1MCN1_AILME     | 372 | PPKARK---PLCPPSLCSSLVITIGDLVLDSD--EENGQKEGR-----             | 409 |
| L5M199     | L5M199_MYODS     | 371 | PPRARK---PVCPPSLCSSLVITIGDLVLDSD--EENGQRGGM-----             | 408 |
| G5B284     | G5B284_HETGA     | 368 | PPKAKK---PACSPFLTTSVITIGDLVLDSEE--EENSQREGK-----             | 405 |
| G1SIM2     | G1SIM2_RABIT     | 366 | PPRARK---PVCPPSLCSSLVITIGDLVLDSD--EENSQKDRQ-----             | 403 |
| G3TC22     | G3TC22_LOXAF     | 368 | PPKTRK---PASSASLCSVAITIGDLVLDSD--EDNGQREGK-----              | 405 |
| A0A091DIW8 | A0A091DIW8_FUKDA | 355 | PPKAKK---PACSPFLTTSVITIGDLVLDSEE--EENSQREGK-----             | 392 |
| A0A1S3FW91 | A0A1S3FW91_DIPOR | 394 | PPRAKK---RVCSPSLCSSLVITIGDLVLDSD--EGNSQREGK-----             | 431 |
| H0XYH6     | H0XYH6_OTOGA     | 335 | PPRARK---PVSPSLCSSLVITIGDLVLDSD--EENGQRKGM-----              | 372 |
| A0A1S3WT25 | A0A1S3WT25_ERIEU | 367 | PSRARI---PECPSPMCSSLVITIGDLVLDSEEEESSQ----GK-----            | 402 |
| A0A1U7RC63 | A0A1U7RC63_MESAU | 364 | PPRAKK---PVQSPSLCSSLVITIGDLVLDSD--EENQ-KEGE-----             | 400 |
| L5KHQ5     | L5KHQ5_PTEAL     | 311 | PPRARK---PVCLPSLCSFVITIGDLVLDSD--EENGQREGR-----              | 348 |
| G3HDD2     | G3HDD2_CRIGR     | 363 | PPGAKK---PMQSPSLCSSLVITIGDLVLDSD--EENS-QKEG-----             | 399 |
| Q5XIB8     | Q5XIB8_RAT       | 337 | PSRVKK---PVLSPSLCSSLVITIGDLVLDSD--EENNQKEGK-----             | 374 |
| Q8K1K3     | Q8K1K3_MOUSE     | 354 | PLTVKK---PVLSPTPCSSLVITIGDLVLDSD--EENNQKEGK-----             | 391 |
| Q8CH11     | Q8CH11_MUSSP     | 351 | PLRVKK---PVLSPTPCSSLVITIGDLVLDSD--EENNQKEGK-----             | 388 |
| G3VNG5     | G3VNG5_SARHA     | 377 | AVGARE---PVSSPSLCSFVATIGDLVLDSD--EGNGQRGGK-----              | 414 |
| F6VXG0     | F6VXG0_MONDO     | 377 | AVGARE---PVHSPSLCSFVITIGDLVLDSD--EGNGQRGGK-----              | 414 |

: \*\*\*\*\*: . .

>sp|Q9BSI4|TINF2\_HUMAN TERF1-interacting nuclear factor 2 OS=Homo sapiens  
>tr|G2HJU8|G2HJU8\_PANTR TERF1-interacting nuclear factor 2 OS=Pan troglodytes  
>tr|G1RZI8|G1RZI8\_NOMLE TERF1-interacting nuclear factor 2 OS=Nomascus leucogenys  
>tr|F7GSQ3|F7GSQ3\_CALJA TERF1-interacting nuclear factor 2 OS=Callithrix jacchus  
>tr|A0A0D9RTU0|A0A0D9RTU0\_CHLSB TERF1-interacting nuclear factor 2 OS=Chlorocebus sabaeus  
>tr|A0A096NXA6|A0A096NXA6\_PAPAN TERF1-interacting nuclear factor 2 OS=Papio anubis  
>tr|F6ZRV3|F6ZRV3\_HORSE TERF1-interacting nuclear factor 2 OS=Equus caballus  
>tr|M3W4C5|M3W4C5\_FELCA TERF1-interacting nuclear factor 2 OS=Felis catus  
>tr|I3M084|I3M084 ICTTR TERF1-interacting nuclear factor 2 OS=Ictidomys tridecemlineatus  
>tr|F1SGN9|F1SGN9\_PIG TERF1-interacting nuclear factor 2 OS=Sus scrofa  
>tr|M3Y318|M3Y318\_MUSPF TERF1-interacting nuclear factor 2 OS=Mustela putorius furo  
>tr|L8I0G5|L8I0G5\_9CETA TERF1-interacting nuclear factor 2 OS=Bos mutus  
>tr|A3KN17|A3KN17\_BOVIN TERF1-interacting nuclear factor 2 OS=Bos taurus  
>tr|A0A1U7U6L7|A0A1U7U6L7\_TARSY TERF1-interacting nuclear factor 2 isoform X1 OS=Tarsius syrichta  
>tr|F1Q2J9|F1Q2J9\_CANLF TERF1-interacting nuclear factor 2 OS=Canis lupus familiaris  
>tr|W5QCX6|W5QCX6\_SHEEP TERF1-interacting nuclear factor 2 OS=Ovis aries  
>tr|K9J163|K9J163\_DESRO Putative terf1-interacting nuclear factor 2 OS=Desmodus rotundus  
>tr|G1MCN1|G1MCN1\_AILME TERF1-interacting nuclear factor 2 OS=Ailuropoda melanoleuca  
>tr|L5M199|L5M199\_MYODS TERF1-interacting nuclear factor 2 OS=Myotis davidii  
>tr|G5B284|G5B284\_HETGA TERF1-interacting nuclear factor 2 OS=Heterocephalus glaber  
>tr|G1SIM2|G1SIM2\_RABIT TERF1-interacting nuclear factor 2 OS=Oryctolagus cuniculus  
>tr|G3TC22|G3TC22\_LOXAF TERF1-interacting nuclear factor 2 OS=Loxodonta africana  
>tr|A0A091DIW8|A0A091DIW8\_FUKDA TERF1-interacting nuclear factor 2 OS=Fukomys damarensis  
>tr|A0A1S3FW91|A0A1S3FW91\_DIPOR TERF1-interacting nuclear factor 2 isoform X1 OS=Dipodomys ordii  
>tr|H0XYH6|H0XYH6\_OTOGA TERF1-interacting nuclear factor 2 OS>Otolemur garnettii  
>tr|A0A1S3WT25|A0A1S3WT25\_ERIEU TERF1-interacting nuclear factor 2 isoform X2 OS=Erinaceus europaeus  
>tr|A0A1U7RC63|A0A1U7RC63\_MESAU TERF1-interacting nuclear factor 2 isoform X1 OS=Mesocricetus auratus  
>tr|L5KHQ5|L5KHQ5\_PTEAL TERF1-interacting nuclear factor 2 OS=Pteropus alecto  
>tr|G3HDD2|G3HDD2\_CRIGR TERF1-interacting nuclear factor 2 OS=Cricetulus griseus  
>tr|Q5XIB8|Q5XIB8\_RAT TERF1 (TRF1)-interacting nuclear factor 2 OS=Rattus norvegicus  
>tr|Q8K1K3|Q8K1K3\_MOUSE TERF1-interacting nuclear factor 2 OS=Mus musculus  
>tr|Q8CH11|Q8CH11\_MUSSP TRF1-interacting protein TIN2 OS=Mus spretus  
>tr|G3VNG5|G3VNG5\_SARHA TERF1-interacting nuclear factor 2 OS=Sarcophilus harrisii  
>tr|F6VXG0|F6VXG0\_MONDO TERF1-interacting nuclear factor 2 OS=Monodelphis domestica

Figure S1. The CK2 consensus motif is conserved across mammalian TIN2 homologs. Alignment generated using Clustal Omega. Identity of species are shown below.

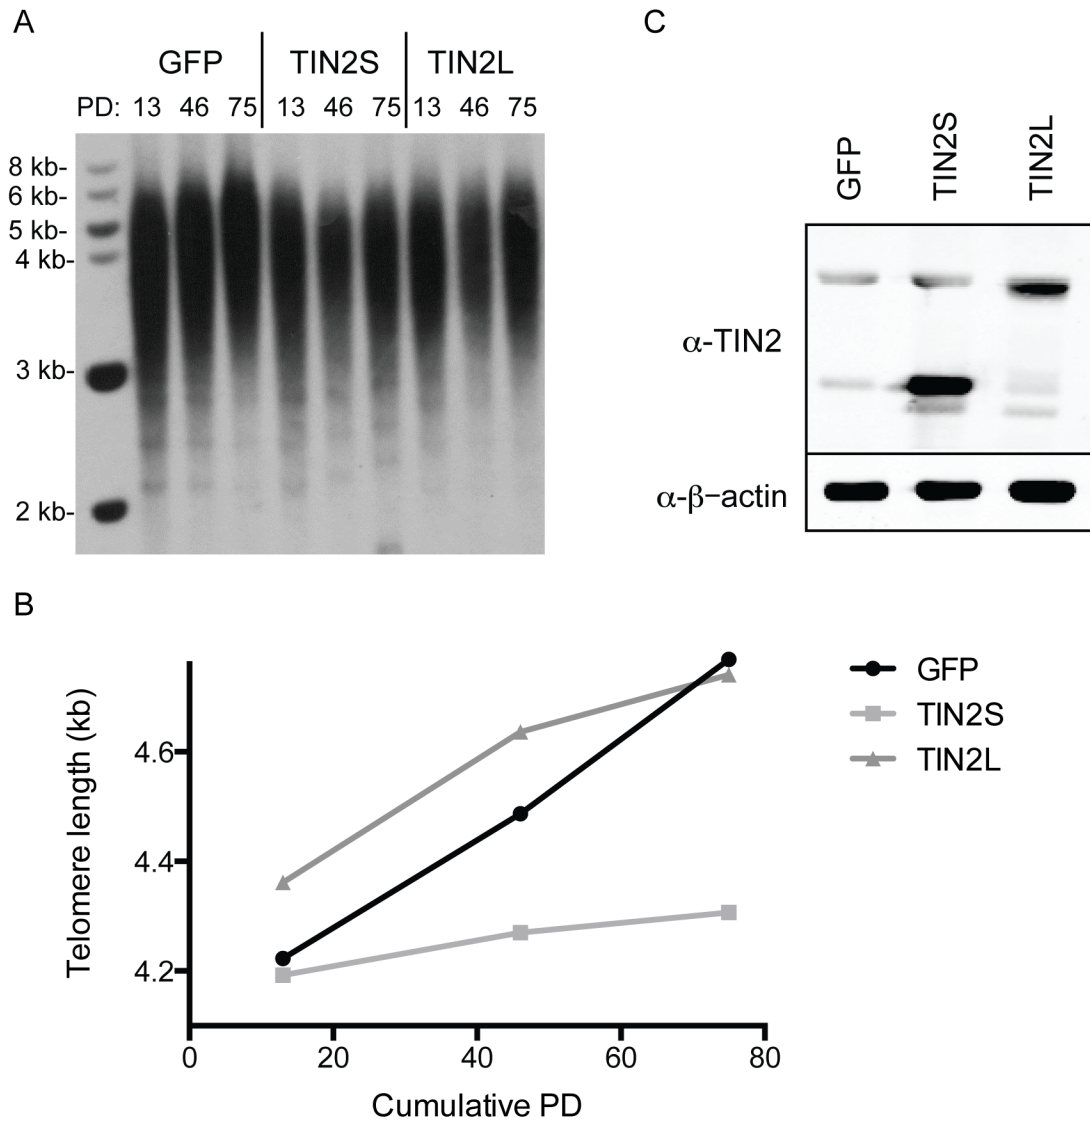

Figure S2. Telomeres in cells overexpressing TIN2L progressively elongated while telomere length remained static in cells overexpressing TIN2S. These cell lines were generated and assayed at a different time from those detailed in Fig. 7. (A) Representative telomere Southern blot analysis of telomere length in kilobasepairs (kb) over time in HT1080 cells overexpressing GFP, TIN2S, or TIN2L. HT1080 cells overexpressing the indicated TIN2 proteins were collected at various times following induction with lentivirus and blasticidin selection and analyzed by the terminal restriction fragment assay. (B) Quantification of (A) using densitometry analysis. (C) Western blot showing TIN2 expression levels in each cell line. Total cell protein lysates were prepared using 2X Laemmli buffer.

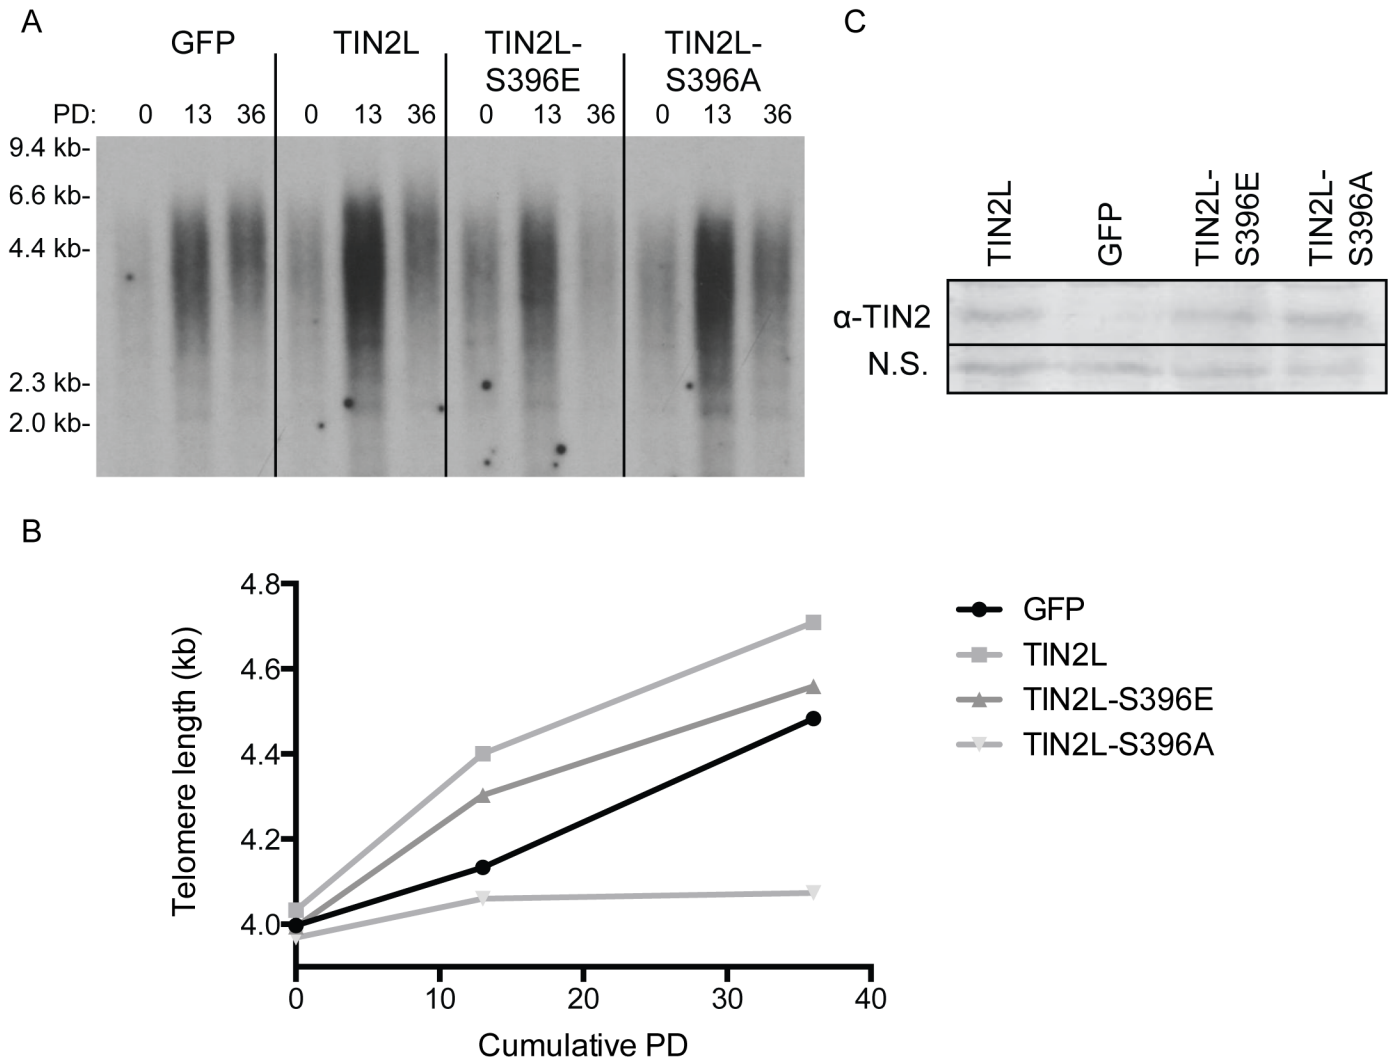

Figure S3. Loss of TIN2L phosphorylation inhibits progressive telomere elongation in telomerase positive HT1080 cells. These cell lines were generated and assayed at a different time from those detailed in Fig. 7. (A) Representative telomere Southern blot analysis of telomere length in kb over time in HT1080 cells overexpressing GFP, TIN2L, TIN2L-S396E, or TIN2L-S396A. HT1080 cells overexpressing the indicated TIN2 proteins were collected at various times following induction with lentivirus and blasticidin selection and analyzed by the terminal restriction fragment assay. (B) Quantification of a using densitometry analysis. (C) Western blot showing TIN2 expression levels in each cell line. Total cell protein lysates were prepared using 2X Laemmli buffer.

Nelson Figure S4

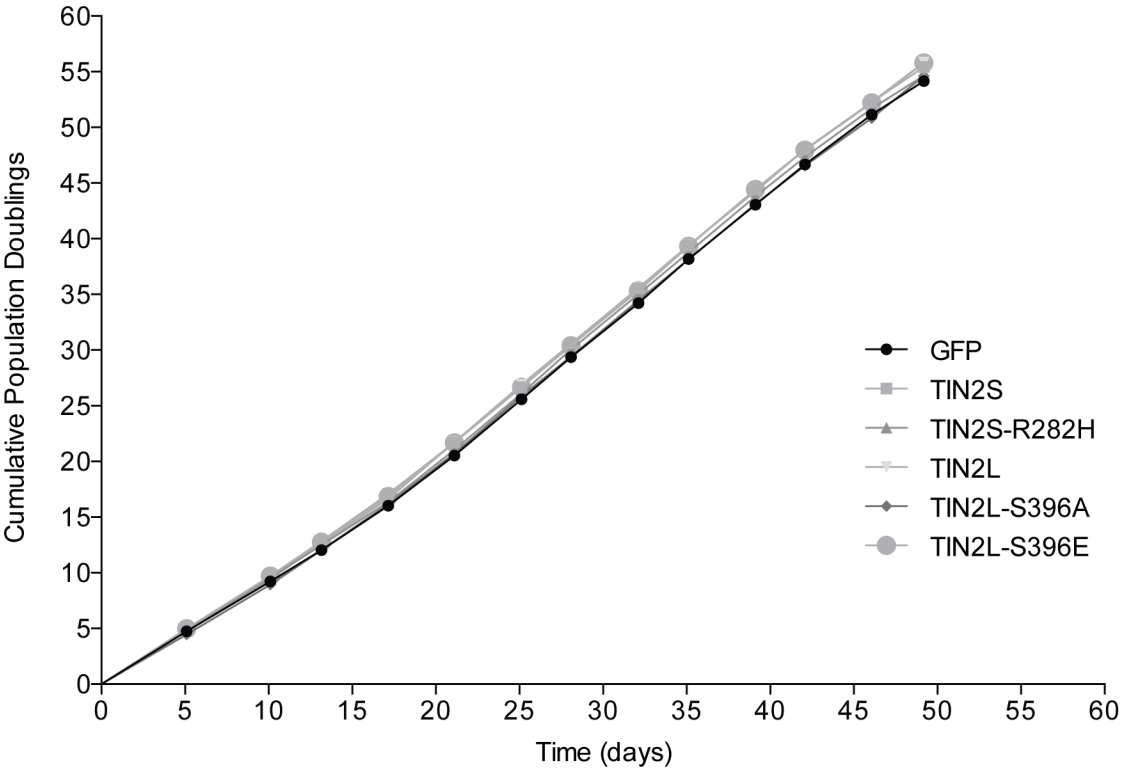

Figure S4. Overexpression of TIN2S, TIN2S-R282H, TIN2L, TIN2L-S396A, and TIN2L-S396E had no effect on HT1080 population doubling time.

A

| <i>TINF2</i> exon | Name/plasmid        | Guide sequence       | Quality Score | BLAST results                           |
|-------------------|---------------------|----------------------|---------------|-----------------------------------------|
| 7                 | TINF2ex7-1<br>Ap285 | GAGGTAATAATGATAGTCTC | 76            | 15/20 nucleotides match<br><i>KCNC2</i> |
| 8                 | TINF2ex8-1<br>Ap286 | GTCTAAAACCAAGTCCCCTA | 78            | 18/20 nucleotides match<br><i>MED1</i>  |

B

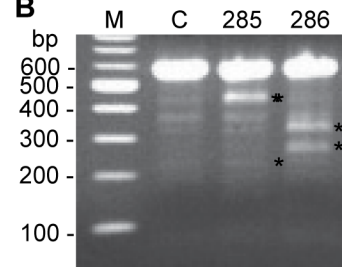

C

|                                              |                            |                                            |                                       |
|----------------------------------------------|----------------------------|--------------------------------------------|---------------------------------------|
| <b>T-REx-293</b><br>285-A<br>285-F4<br>286-A | 285-F10                    | g.2370_2379del<br><br>p.(R365SfsTer24)     | g.2378del<br><br>p.(L364HfsTer22)     |
|                                              | 285-F3                     | g.2378_2379insA<br><br>p.(L366TfsTer6)     | g.2378del<br><br>p.(L364HfsTer22)     |
|                                              | 286-R                      | g.2525_2568del<br><br>p.(P379FfsTer3)      | g.2560_2567del<br><br>p.(D391FfsTer3) |
| <b>HT1080</b><br>285-1<br>286-29             | 286-6A<br>286-6B<br>286-6E | g.2551_2565del<br><br>p.(I387_L392delinsM) | g.2561del<br><br>p.(D391TfsTer3)      |

**Figure S5.** CRISPR/Cas9 targeting of *TIN2L* expression. A. Guides utilized. Quality scores determined using the CRISPR Design Tool. B. Efficiency of site specific targeting as determined using the Guide-It Mutation Detection Kit (Clontech). Predicted fragments indicated by asterisks. C. Mutants generated with genomic changes on each allele as determined by Sanger sequencing of amplicons encompassing the targeted region and corresponding protein changes. Altered sequences indicated in the schematics as colored bars. Individual wild type and mutant clone IDs indicated. 286-6A, 6B, and 6E are individual subclones.

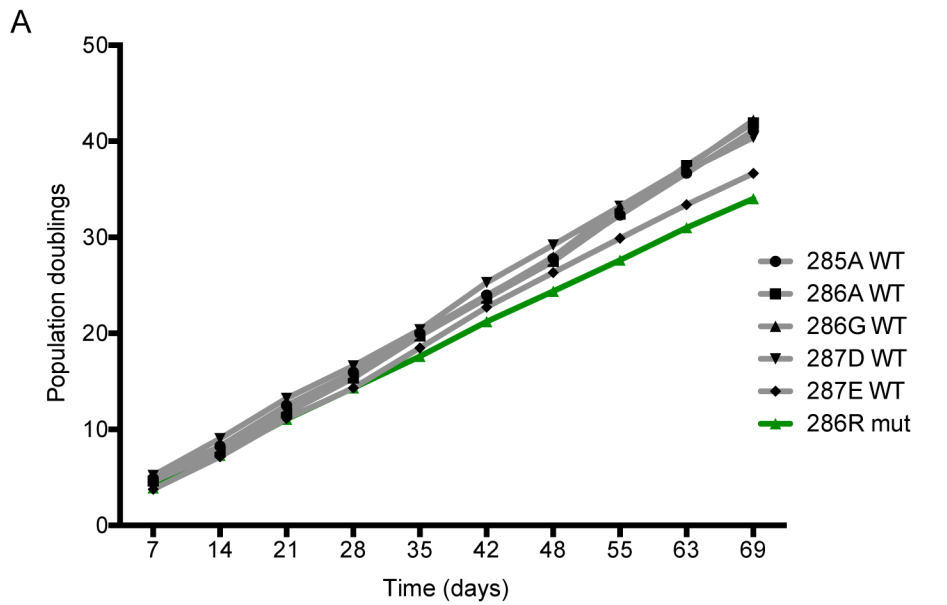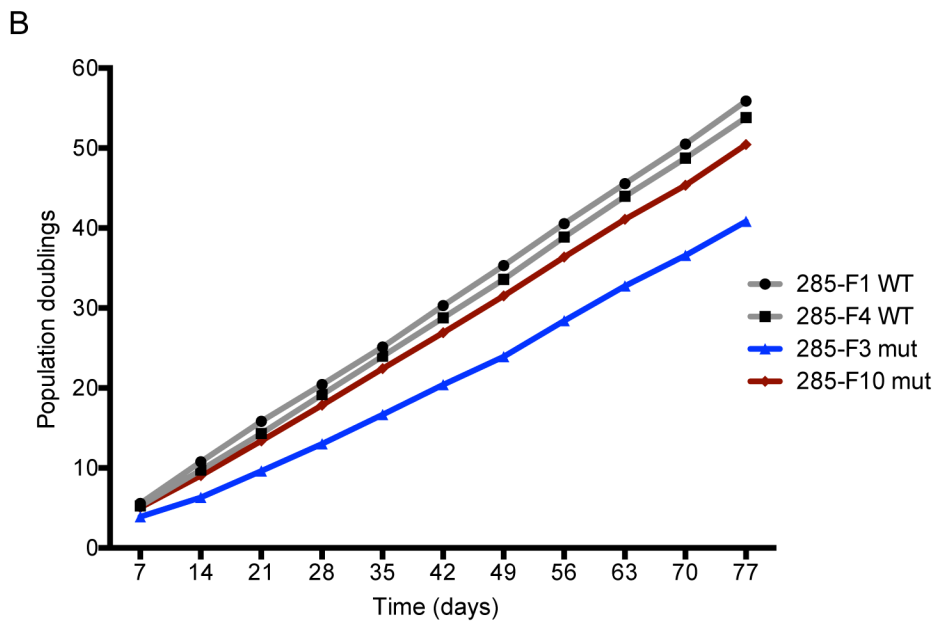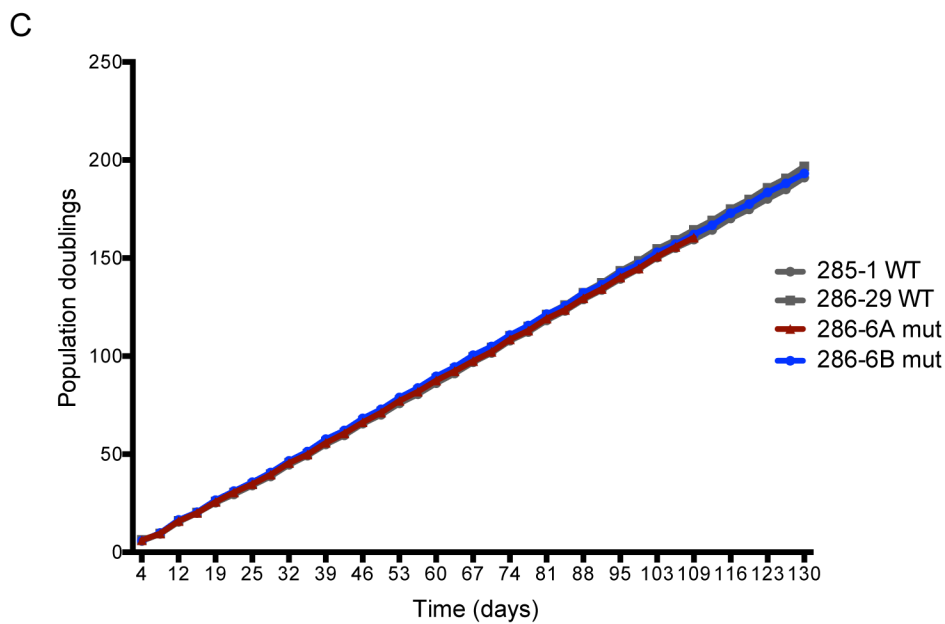

Figure S6. Loss of TIN2L had variable impact on growth. (A) and (B) HT1080 WT and mutant cell lines. (C) T-REx 293 WT and mutant cell lines.

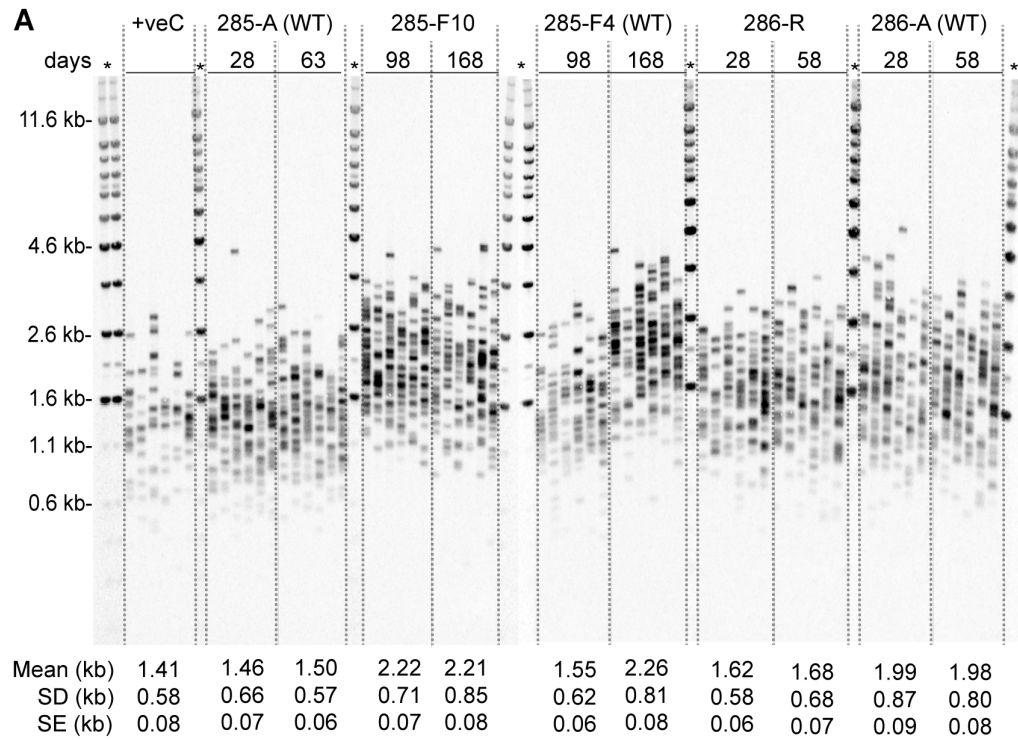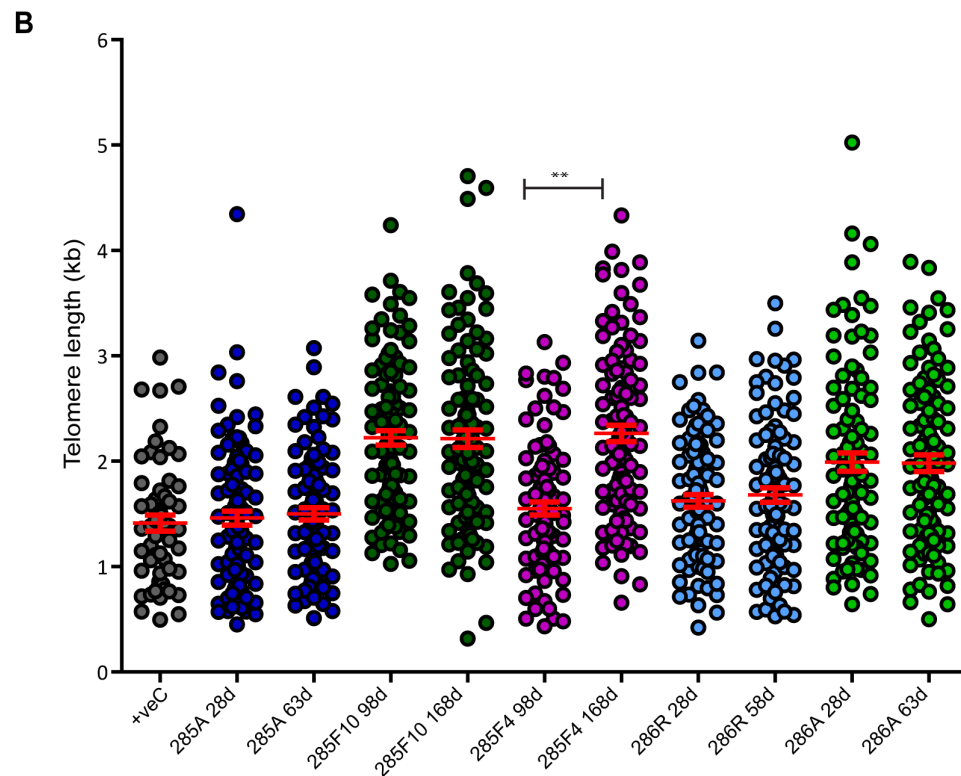

Figure S7. Telomere lengths of TIN2L mutant Flp-In T-REx lines are indistinguishable from TIN2L wildtype lines. (A) 17p STELA analysis of DNA isolated at the indicated numbers of days from the point of clonal line derivation. Mean lengths, standard deviation (SD), and standard error (SE) in kb are indicated. (B) Individual telomere lengths in the designated lines at the designated days.
